1 The Effect of Minnelide against SARS-CoV-2 in a Murine Model

2

3 Marley C. Caballero Van Dyke<sup>1</sup>, Heather L. Mead<sup>1</sup>, Mitchell Bryant<sup>1</sup>, Klaire L. Laux<sup>1</sup>, Daniel R.

4 Kollath<sup>1</sup>, Vanessa K. Coyne<sup>1</sup>, Karis J. Miller<sup>1</sup>, Nathan E. Stone<sup>1</sup>, Sierra A. Jaramillo<sup>1</sup>, Paul Keim<sup>1</sup>,

5 Clara Milikowski<sup>2</sup>, Vineet K. Gupta<sup>3</sup>, Selwyn M. Vickers<sup>4</sup>, Ashok K. Saluja<sup>3</sup>, Mohana R.

6 Velagapudi<sup>5\*</sup>, and Bridget M. Barker<sup>1</sup>

7

8 <sup>1</sup>Pathogen and Microbiome Institute, Northern Arizona University, Flagstaff Arizona, USA

9 <sup>2</sup>Department of Pathology, University of Miami, Miller School of Medicine, Miami, Florida, USA

10 <sup>3</sup>Department of Surgery and, Sylvester Comprehensive Cancer Center, University of Miami, Miller

11 School of Medicine, Miami, Florida, USA

12 <sup>4</sup>University of Alabama at Birmingham (UAB) School of Medicine, Birmingham, Alabama, USA

13 <sup>5</sup>Minneamrita Therapeutics LLC, Tampa, Florida, USA

14

15

16 Running Head: Minnelide Treatment against SARS-CoV-2

17 **\*Address Correspondence to** Mohana Velagapudi, M.D., [mvelagapudi@minneamrita.com](mailto:mvelagapudi@minneamrita.com)

18

19

20

21

## 22 **Abstract**

23 Severe acute respiratory syndrome coronavirus 2, SARS-CoV-2, is the causative agent of coronavirus  
24 disease 2019, COVID-19, and the current COVID-19 pandemic. Even as more vaccine candidates are  
25 released, more treatment options are critically needed. Here, we investigated the use of Minnelide, a  
26 water soluble pro-drug with anti-inflammatory properties, for the treatment of COVID-19. To do this,  
27 k18-hACE2 mice were infected with SARS-CoV-2 or given PBS control intranasally. The next day  
28 mice were either treated daily with low dose (0.0025mg/day) or high dose Minnelide (0.005mg/day),  
29 or given vehicle control intraperitoneal. Mice were weighed daily, and sacrificed at day 6 and 10  
30 post-infection to analyze viral burden, cytokine response, and pathology. We observed a reduction in  
31 viral load in the lungs of Minnelide-treated mice infected with SARS-CoV-2 at day 10 post-infection  
32 compared to day 6 post-infection. All SARS-CoV-2 infected non-treated mice were moribund six  
33 days post-infection while treatment with Minnelide extended survival for both low (60% survival)  
34 and high (100% survival) dose treated mice ten days post-infection. Interestingly, cytokine analysis  
35 demonstrated a significant reduction in IL-6 (lung and heart) and D-dimer (serum) in high dose  
36 treated SARS-CoV-2 infected mice compared to mice infected with SARS-CoV-2 alone at day 6  
37 post-infection. Additionally, histology analysis revealed that Minnelide treatment significantly  
38 improved lung pathology ten days post-infection with SARS-CoV-2 with all the mice exhibiting  
39 normal lung tissue with thin alveolar septa and no inflammatory cells. Overall, our study exhibits  
40 potential for the use of Minnelide to improve survival in COVID-19 patients.

## 41 **1 Introduction**

42 Coronavirus disease 2019 (COVID-19) is an infectious respiratory disease caused by a novel  
43 severe acute respiratory syndrome coronavirus 2 (SARS-CoV-2) [1]. This novel viral disease was  
44 first recognized in December 2019 in Wuhan City, China and has since spread rapidly throughout the

45 world, and subsequently causing the worst global pandemic of recent times with more than 140  
46 million confirmed cases and more than 3 million deaths worldwide [2]. Patients with COVID-19  
47 most commonly report fever, chills, fatigue, cough, shortness of breath, and difficulty in breathing  
48 which may appear 2-14 days after exposure to the virus. In some cases, patients also have increased  
49 sputum production, anosmia, dyspnea, ageusia, headache, hemoptysis, diarrhea, and myalgia [3, 4].  
50 Interestingly, roughly 20% percent of patients did not show any symptoms but still have capacity to  
51 transmit disease to other healthy individuals making this disease difficult to control [5]. In general,  
52 adults with SARS-CoV-2 infection can be grouped into the following severity of illness categories  
53 [6]. *Asymptomatic or Presymptomatic Infection*: Individuals who test positive for SARS-CoV-2  
54 using a virologic test (i.e., a nucleic acid amplification test or an antigen test) but who have no  
55 symptoms that are consistent with COVID-19. *Mild Illness*: Individuals who have any of the various  
56 signs and symptoms of COVID-19 (e.g., fever, cough, sore throat, malaise, headache, muscle pain,  
57 nausea, vomiting, diarrhea, loss of taste and smell) but who do not have shortness of breath, dyspnea,  
58 or abnormal chest imaging. *Moderate Illness*: Individuals who show evidence of lower respiratory  
59 disease during clinical assessment or imaging and who have saturation of oxygen ( $SpO_2$ )  $\geq 94\%$  on  
60 room air at sea level. *Severe Illness*: Individuals who have  $SpO_2 < 94\%$  on room air at sea level, a  
61 ratio of arterial partial pressure of oxygen to fraction of inspired oxygen ( $PaO_2/FiO_2$ )  $< 300$  mm Hg,  
62 respiratory frequency  $> 30$  breaths/min, or lung infiltrates  $> 50\%$ . *Critical Illness*: Individuals who  
63 have respiratory failure, septic shock, and/or multiple organ dysfunction. However, the criteria for  
64 each category may overlap or vary across clinical guidelines and clinical trials, and a patient's  
65 clinical status may change over time. Mortality among these patients mainly occurs through the  
66 development of viral pneumonia-induced acute respiratory distress syndrome (ARDS).

67 In ARDS, SARS-CoV-2 infection triggers a dysfunctional immune response causing a  
68 cytokine storm which causes most of the damage to the lung. COVID-19 patients with ARDS have

69 higher level of proinflammatory cytokine like interleukin (IL)-1 $\alpha$ , IL-1 $\beta$ , IL-1 receptor antagonist  
70 protein (IL1RA), IL-2, IL-4, IL-6, granulocyte-macrophage colony-stimulating factor (GM-CSF),  
71 and interferon (IFN)-gamma in blood compared to healthy controls [4, 7]. Further analysis of  
72 Bronchoalveolar lavage fluid (BALF) in patients with severe COVID-19 also showed higher levels  
73 of IL-6, IL-8, and IL-1 $\beta$  [8]. Single-cell RNA sequencing analysis of BALF showed enrichment of  
74 proinflammatory monocyte-derived macrophages in patients with severe COVID-19 [8] resulting in  
75 macrophage-activation syndrome (MAS), a life-threatening clinical manifestation observed in  
76 autoimmune diseases and several viral infections like influenza [9]. Macrophage activation often  
77 leads to impairment of cytotoxic activity of CD8<sup>+</sup> T cells and NK cells thereby preventing clearance  
78 of infected host cells [10]. In addition, SARS-CoV-2 infection also activates TNF and IFN signaling  
79 thereby causing T-cell apoptosis, further causing hyperinflammation and virus replication, and  
80 subsequently, causing damage to lung epithelial and endothelial cells resulting in ARDS.

81 SARS-CoV-2 is a positive-sense, single-stranded RNA viruses which belong to the  
82 Betacoronavirus genus [11]. These viruses have spike (S)-glycoprotein on their surface, which  
83 through the receptor-binding domain (RBD) facilitates the entry of SARS-CoV-2 into host cells by  
84 binding to the human angiotensin-converting enzyme 2 (ACE2) receptor [12]. ACE2 is  
85 predominantly expressed in the epithelium of the human lung, small intestine, and oral mucosa [12,  
86 13] and therefore provide route of infection. Once inside the cell, the viral genome is transcribed by  
87 the viral RNA-dependent RNA polymerase and subsequently translated using host ribosomes to  
88 synthesize viral proteins. Finally, mature virions are assembled and packaged in the cytoplasm of the  
89 infected cell and subsequently released through exocytosis. ACE2 expression often determines the  
90 susceptibility for COVID-19 infection. For example, children express very low level of ACE2 which  
91 makes them less susceptible to SARS-CoV-2 infection compared to adults [14]. Notably, structural  
92 differences between mouse ACE2 and the human counterpart makes it unsuitable for the spike

93 protein of SARS-CoV-2 and therefore it does not facilitate the entry of the virus into the cells. As a  
94 result, wild-type laboratory mice are not suitable for SARS-CoV-2 infection studies. However, new  
95 studies demonstrate the ability of variants of concern (VOCs) to infect common laboratory mice [15].  
96 To study SARS-CoV-2 pathogenesis and potential treatment options, the ideal model is the K18-  
97 hACE2-transgenic mice because SARS-CoV-2 infection in these mice replicates human pulmonary  
98 disease similar to COVID-19. This is due to human-like ACE-2 expression driven by the epithelial  
99 cell cytokeratin-18 (K18) promoter, which expresses ACE-2 in epithelial cells [16]. This mouse  
100 model was initially developed by Tseng, C. *et al* [17] for the study of SARS-CoV pathogenesis.  
101 SARS-CoV-2 also uses ACE-2 for the entry of virus into the host cell, and mimics respiratory  
102 disease similar to severe COVID-19 in humans [18].

103 Minnelide is a water soluble pro drug of an anti-inflammatory active diterpene triepoxide  
104 compound triptolide which was purified from a Chinese herb *Tripterygium wilfordii* Hook F [19].  
105 Historically, triptolide has been used for the therapy of arthritis in traditional Chinese medicine for  
106 more than two thousand years. Triptolide has been documented to decrease inflammation by  
107 decreasing NF- $\kappa$ B activity [20-22] leading to a decrease in production of inflammatory cytokines like  
108 IL-6 [23] and IL-1 $\beta$  [24]. Triptolide, the active component of this drug is also reported to inhibit  
109 acute lung injury in murine models [25]. Additionally, unpublished preclinical studies from our  
110 laboratory show that in a mouse model of pulmonary fibrosis, Minnelide was highly effective in  
111 decreasing fibrosis and showed improvement in various lung functions. In a mouse model of  
112 pancreatic cancer, Minnelide showed a decrease in IL-1 $\beta$  as well as NF- $\kappa$ B activity [20, 26]. Anti-  
113 inflammatory and anti-fibrotic properties of Minnelide not only makes it an ideal candidate for early  
114 therapeutic intervention against COVID-19 patients, who develop ARDS because of hyperactive  
115 immune response and cytokine storm, but also makes it suitable for depleting fibrosis caused by  
116 COVID-19 associated lung injury. In the current study, we show that Minnelide treatment

117 significantly improved survival of K18-hACE2 mice infected with SARS-CoV-2. Further analysis  
118 showed significant reduction in SARS-CoV-2 viral burden in lungs of Minnelide treated mice. Our  
119 results also show that Minnelide treatment elicited an anti-inflammatory response against SARS-  
120 CoV-2 resulting in improved lung histology and thereby highlighting its therapeutic potential in  
121 COVID-19 patients suffering from ARDS.

## 122 **2 Results**

### 123 **2.1 SARS-CoV-2 Viral Burden in Mice Treated with Minnelide**

124 To understand whether treatment with Minnelide would demonstrate therapeutic benefits  
125 against COVID-19, we infected K18-hACE2 mice with 2000 PFU of SARS-CoV-2 or PBS control  
126 via intranasal infection. The next day mice were treated daily with either low dose (0.0025mg/day) or  
127 high dose (0.005mg/day) Minnelide, or vehicle control, PBS via intraperitoneal injection (IP) (Figure  
128 1).

129 Viral burden was measured in the lung and brain at day 6 and 10 post-infection using RT-qPCR  
130 and compared among groups (Figure 2; Table S1 and S2). In the brain, the highest levels of viral  
131 burden were detected in SARS-CoV-2 non-treated mice and low dose treated mice at day 6 post-  
132 infection (Figure 2; Table S1). Mice infected with SARS-CoV-2 and treated with high dose of  
133 Minnelide still exhibited a high viral load at day 6 post-infection (Figure 2; Table S1). For day 10  
134 post-infection, the brain did exhibit less viral burden in both the low dose and high dose Minnelide  
135 treated groups compared to day 6 post-infection, although not significant (Figure 2; Table S1). In the  
136 lung, there was high viral load detected at day 6 post-infection across all groups, SARS-CoV-2  
137 infected non-treated mice, low dose, and high dose Minnelide treated mice infected with SARS-CoV-  
138 2 (Figure 2; Table S2). At day 10 post-infection, there was a lower level of viral burden in both the  
139 low and high dose treated mice infected with SARS-CoV-2, although not significant (Figure 2; Table

140 S2). Together, these results indicate that Minnelide treatment results in a measurable, but not  
141 statistically significant reduction in viral burden.

## 142 **2.2 Treatment with Minnelide Increases Survival and Elicits an Anti-Inflammatory Response** 143 **against SARS-CoV-2**

144 To further understand the therapeutic benefits of Minnelide treatment, we observed mice until  
145 10 days post-infection weighing them daily. SARS-CoV-2 infected non-treated mice demonstrated  
146 100% mortality at day 6 post-infection (Figure 3A). Mice infected with SARS-CoV-2 and treated  
147 with low dose Minnelide demonstrated 60% survival by day 10 post-infection. Interestingly, all mice  
148 infected with SARS-CoV-2 and treated with high dose Minnelide were alive at day 10 post-infection  
149 (100% survival) (Figure 3A). Additionally, we also observed 100% survival rates in the uninfected,  
150 vehicle control and Minnelide high dose only treated mice at both time points. This data suggests  
151 therapeutic potential of Minnelide for COVID-19 patients.

152 Additionally, weights of mice were monitored daily. All non-infected control mice remained  
153 within +/- 1g of their starting weight during the course of the experiment (Figure 3B). In contrast, all  
154 mice infected with SARS-CoV-2 not treated with Minnelide experienced a significant weight loss  
155 between day 4 and day 6 post-infection with no mice surviving past this time point; these mice were  
156 moribund (defined as a weight drop of >20%) and euthanized on day six (Figure 3B). The infected  
157 mice that received Minnelide therapy experienced less weight loss than infected mice without  
158 therapy. The increase in drug dosage, 0.005mg/day treated mice, demonstrated less weight loss  
159 compared to low dose, 0.0025mg/day treated mice, although no statistical significance was found  
160 (Figure 3B). All mice demonstrated weight loss between days 4-6 post-infection. Interestingly, mice  
161 that received treatment recovered their weight after day 6 post-infection. This is clearly demonstrated  
162 by the high dose treated mice, because none succumbed to the infection in that group (Figure 3B).

163 All mice infected with SARS-CoV-2 and without Minnelide treatment were euthanized on day 6  
164 post-infection due to extreme weight loss.

165 Next, we evaluated select cytokines (IL-6, D-dimer, and Fibrinogen) in the lung, heart, and  
166 serum in mice infected with SARS-CoV-2 and treated with Minnelide on days 6 and 10 post-  
167 infection. For IL-6 in the lungs and heart, we observed a significant reduction in IL-6 production in  
168 mice infected with SARS-CoV-2 treated with high dose Minnelide at day 6 post-infection compared  
169 to SARS-CoV-2 alone (Figure 4A). We observed no significant differences in IL-6 in the serum  
170 across all groups (Figure 4G). For D-dimer, there was a significant reduction in the lungs at day 10  
171 post-infection in both low and high dose treated mice infected with SARS-CoV-2 compared to  
172 vehicle control mice (Figure 4B). At day 6 post-infection, we observed a significant reduction in D-  
173 dimer in the serum of mice treated with low and high dose Minnelide compared to mice infected with  
174 SARS-CoV-2 alone and not treated (Figure 4H). We observed no significant differences in D-dimer  
175 production in the heart across groups (Figure 4E). For Fibrinogen, the data show significant reduction  
176 at day 10 post-infection in mice treated with high dose Minnelide compared to low dose Minnelide  
177 infected with SARS-CoV-2 (Figure 4C). There were no significant differences for Fibrinogen  
178 production in the heart or serum across groups (Figure 4F and 4I).

### 179 **2.3 Histology**

180 Lastly, we sought to determine the effect of Minnelide treatment on the pathology of mice  
181 infected with SARS-CoV-2. Figure 5A is representative of the five mice treated with saline only that  
182 were all sacrificed on day 10 and shows normal lung tissue with thin alveolar septa without increase  
183 in inflammatory cells. Figure 5B is representative of the five mice that were treated with high dose  
184 Minnelide (0.005mg) alone that were all sacrificed on day 10 with similar findings to the saline only  
185 group. Figure 5C is representative of the six mice infected with virus without treatment that were



186 sacrificed on day 6. Three of the mice from the virus only group (50%) showed focal widening of  
187 alveolar septa with mild increase in small mononuclear cells (lymphocytes) and increased capillaries  
188 (Figure 5C). Figures 5D-5I are representative of the group of nine mice (eight mice lungs reviewed)  
189 five of which were sacrificed on day 6 (Figures 5D-5F) and four of which were sacrificed on day 10  
190 (Figures 5G-5I) all of which were infected with virus and treated with low dose Minnelide  
191 (0.0025mg). On day 6, lungs showed alveolar findings that were similar to the control group with  
192 normal findings with the exception of one mouse that showed platelet aggregates in blood vessels  
193 (Figures 5E and 5F). Of the three mice that were sacrificed on day 10, all (100%) showed  
194 perivascular and peribronchiolar infiltration by large reactive blast-like cells (Figures 5G-5I). Figures  
195 5J-5K are representative of the ten mice infected with virus and treated with high dose Minnelide of  
196 which five were sacrificed on day 6 and five were sacrificed on day 10. Alveolar septa were normal  
197 in all cases and only one case showed few early fibrin thrombi (Figure 5K). Of those mice sacrificed  
198 on day 10, all (100%) were without changes.

### 199 **3 Discussion**

200 Beginning in December 2019, the COVID-19 pandemic rapidly created a global health  
201 emergency and killed millions of people worldwide. The clinical manifestation of this disease  
202 appears to be extremely variable, from asymptomatic to severe pneumonia leading to multi-organ  
203 failure requiring critical care. Recent studies indicate that a SARS-CoV-2 induced ARDS contributes  
204 to disease severity and mortality among patients. Although inflammation is a crucial host mechanism  
205 in preventing disease, in patients with COVID-19, hyperinflammation after SARS-CoV-2 infection  
206 causes a majority of the host tissue damage. Therefore, therapeutic approaches to control  
207 inflammation can be a way forward in limiting the damage caused by SARS-CoV-2 infection.  
208 Minnelide is a water soluble pro drug of a compound triptolide which was purified from a Chinese  
209 herb *Tripterygium wilfordii* Hook F (TWHF) [19]. For the past two thousand years, TWHF has been

210 used in traditional Chinese medicine for the treatment of leprosy and rheumatoid arthritis. Further  
211 research revealed that triptolide is the bioactive component of TWHF which is responsible for its  
212 immunosuppressive anti-inflammatory properties. Unpublished work from our lab has shown  
213 reduced inflammation in a mouse model of chronic pancreatitis, a chronic inflammatory disease of  
214 pancreas, thereby making it a potential treatment for COVID-19. Our current study showed that  
215 Minnelide at a dose of 0.005mg/day in K18-hACE2-transgenic mice provide 100% survival benefit  
216 10 days post-intranasal infection with SARS-CoV-2 (Figure 3). Further, we observed 100% mortality  
217 in nontreated mice post SARS-CoV-2 by day 6 post-infection (Figure 3).

218 Immunopathology of COVID-19 has revealed that immunity-mediated cytokine release  
219 syndrome is central to ARDS in patients with SARS-CoV-2 [27]. Initial results showed that patients  
220 with SARS-CoV-2 have higher level of proinflammatory cytokines in circulation such as IL-1 $\alpha$ , IL-  
221 1 $\beta$ , IL-1 receptor antagonist protein (IL1RA), IL-2, IL-4, IL-6, granulocyte-macrophage colony-  
222 stimulating factor (GM-CSF), and IFN-gamma compared to healthy controls [4, 7]. In addition,  
223 patients with severe COVID-19 also have higher levels of IL-6, IL-8, and IL-1 $\beta$  in the BALF [8].  
224 Furthermore, patients who have been admitted to Intensive Care Units (ICUs) have a higher level of  
225 proinflammatory cytokines than the non-ICU patients, which highlights the role of proinflammatory  
226 cytokines in severity of the disease. Our data shows that Minnelide treatment in K18-hACE2-  
227 transgenic mice infected with SARS-CoV-2 promotes survival by eliciting an anti-inflammatory  
228 response (Figure 4). Cytokine analysis of lungs revealed significant reduction in proinflammatory  
229 cytokine IL-6 after treatment with Minnelide (Figure 4).

230 D-dimer is the product of fibrinolytic degradation of fibrin, and elevated levels indicate the  
231 activation of coagulation and fibrinolysis systems in the body, which is extremely useful for the  
232 diagnosis of thrombotic diseases [28]. Healthy individuals have low levels of circulating D-dimer  
233 while chronic inflammatory conditions like rheumatoid arthritis, sickle cell disease, and asthma have

234 elevated D-dimer level in the blood [29]. Increased D-dimer levels were also reported in patients with  
235 COVID-19 with even higher levels among COVID-19 patients who required hospitalization, as well  
236 as those aged older than 60 years [29]. Recent reports showed that respiratory deterioration is linked  
237 to thrombosis and high D-dimer level associated with poor prognosis and higher mortality in  
238 COVID-19 patients [30]. Fibrinogen is a soluble glycoprotein present in blood plasma which is  
239 enzymatically converted by thrombin to fibrin at the time of tissue injury, causing formation of fibrin  
240 based blood clot to stop bleeding. Recent studies shows that COVID-19 patients have significantly  
241 high fibrinogen levels in critically ill patients making them susceptible for the coagulopathy and  
242 prothrombic diathesis [31]. Therefore, monitoring levels of D-dimer and fibrinogen in COVID-19  
243 patients helps in understanding the progressive severity of the disease with higher level predicting  
244 requirement of critical care and any experimental therapy against COVID-19. Our study shows that  
245 Minnelide significantly reduces D-dimer and fibrinogen level in lungs of SARS-CoV-2 infected mice  
246 (Figure 4). Furthermore, analysis of serum shows that Minnelide treatment causes a significant  
247 reduction in D-dimer level at day 6 post-infection in K18-hACE2-transgenic mice after SARS-CoV-2  
248 infection when compared to the non-treated control (Figure 4).

249 Histologic evaluation of COVID-19 patients' lung shows diffuse alveolar damage with hyaline  
250 membranes, fibrin deposits, edema multinucleated cells, and immune infiltration. Previous work by  
251 Yinda, et al. [18] has shown that K18-hACE2 mice develop edema-associated acute lung injury after  
252 SARS-CoV-2 infection which resembles the clinical features of COVID-19 patients. Analysis of  
253 hematoxylin and eosin-stained lung sections from K18-hACE2 mice infected with SARS-CoV-2  
254 revealed that Minnelide treatment significantly improves lung histology on day 10 post-infection  
255 with all the mice showed normal lung tissue with thin alveolar septa with no inflammatory cells  
256 (Figure 5).

257 Minnelide is in clinical trials for the treatment of various cancers and doses used in present  
258 study are equivalent to human doses, which did not show any significant toxicity in a dose-escalation  
259 phase I clinical trial. In the current study, Minnelide, water soluble pro-drug of triptolide, shows  
260 significant improvement in survival in K18-hACE2 mouse model of SARS-CoV-2 infection. Further  
261 analysis reveals that Minnelide treatment induces anti-inflammatory response and showed significant  
262 improvement in lung histology. Therefore, present study highlights the potential of Minnelide in  
263 improving survival of hospitalized patients who have presented with ARDS after SARS-CoV-2  
264 infection and require aggressive critical care.

## 265 **4 Materials and Methods**

### 266 **4.1 Mice**

267 The K18-hACE2 COVID-19 transgenic mouse model (B6.Cg-Tg (K18-ACE2)2Primm/J, Stock  
268 No. 034860, Jackson Laboratory, Bar Harbor, ME, USA) was used in the current study. These mice  
269 express the human angiotensin-converting enzyme 2 (hACE2) transmembrane protein under an  
270 epithelial cell promoter, rendering them susceptible to infection with human coronaviruses, such as  
271 SARS-CoV and CoV-2, that utilize hACE2 for attachment and entry into host cells. hACE2 male and  
272 female mice (6-8 weeks) were used for these studies according to NIH guidelines for housing and  
273 care in a biosafety level 3 animal laboratory. All procedures were approved by the Institutional  
274 Animal Care and Use Committee (protocol number 20-005) of Northern Arizona University.

### 275 **4.2 Virus and Media**

276 This study used coronavirus SARS-CoV-2 isolate USA-WA1/2020 (NR-52281; BEI  
277 Resources, Manassas, VA, USA). Viral propagation occurred in Vero E6 cells (ATCC CRL-1586)  
278 from the American Type Culture Collection (ATCC, Manassas, VA, USA) in Eagle's minimum  
279 essential medium (EMEM) supplemented with 2% or 10% (for cell propagation) fetal bovine serum

280 (FBS), 100 U/ml penicillin, 100 µg/ml streptomycin (Pen-Strep), 0.01 M HEPES, 1 mM sodium  
281 pyruvate, 1× nonessential amino acids solution (Thermo Fisher, USA), and 2 mM L-glutamine.  
282 Briefly, a t175 flask that was ~50% confluent was infected with SARS-CoV-2 virus, whereby 10 mL  
283 of fresh 2% FBS growth media containing 100µL of the BEI viral stock was added to VeroE6 cells  
284 and gently rocked on a rocking platform for 1 h at room temperature. 15 mL of additional 2% FBS  
285 growth media was then added to the flask to bring the final volume to 25 mL. The flask was  
286 incubated for 7 days at 37°C in 5% CO<sub>2</sub> and inspected for viral replication at day 7; cell  
287 death/rounding was used as a proxy for successful viral propagation and was observed by inverted  
288 microscope. The cells/virus were then subjected to three freeze/thaw cycles at -80°C to maximize the  
289 release of virus from cells. The contents were removed from the flask and placed in a 50mL conical  
290 tube that was centrifuged at 500 × g at 4°C for 15 min to separate the cellular debris from the  
291 supernatant containing the virus. 1 mL aliquots of the supernatant (viral stocks) were stored at -80°C  
292 for future use.

293  
294 Concentration of the viral stocks were determined by plaque assay. 6-well plates (CLS3516;  
295 Millipore Sigma) were seeded with  $\sim 3.0 \times 10^5$  cells/well and incubated for 48 to 72 h at 37°C in 5%  
296 CO<sub>2</sub> until 80 to 90% confluency was reached. The viral stock was serially diluted in serum free  
297 Dulbecco's MEM (DMEM; Millipore Sigma, USA). Serial dilutions were prepared as follows; 30µL  
298 of stock virus was added to 270µL DMEM to create a 10<sup>-1</sup> stock, 30µL of this stock was then added  
299 to 270µL of DMEM to create a 10<sup>-2</sup> stock. This continued to create 10<sup>-3</sup>, 10<sup>-4</sup>, and 10<sup>-5</sup> viral stocks.  
300 Prior to infection, the growth medium was replaced with fresh medium containing 2% FBS and  
301 infected with 100µL of each SARS-CoV-2 dilution; dilutions 10<sup>-1</sup> through 10<sup>-5</sup> were tested in  
302 triplicate. The 6-well plates were briefly rocked on a rocking platform and set to incubate for 1 hour  
303 at 37°C in 5% CO<sub>2</sub>. Medium was then replaced with a 1× Dulbecco's MEM (DMEM, Millipore  
304 Sigma, USA)/1.2% low-melting-point agarose (Bio-Rad, USA) overlay. This was allowed to solidify

305 at room temperature for 15 min and incubated for 120 h at 37°C in a 5% CO<sub>2</sub> atmosphere. Then,  
306 2.0 ml of 4% paraformaldehyde was added to each overlay for 30 min, followed by staining with 1%  
307 crystal violet, removal of the overlay, and a triple rinse with phosphate-buffered saline (PBS).  
308 Uninfected cells were included as a control for all experiments and SARS-CoV-2 manipulations were  
309 conducted in a BSL-3 facility. PFUs were counted and averaged for each dilution. The concentration  
310 of undiluted viral stocks used for the animal experiments described herein was determined to be  
311  $1 \times 10^5$  PFU/mL. Further dilution was completed in PBS to the infection concentration of 2000 PFU.

### 312 **4.3 SARS-CoV-2 Infection and Treatments**

313 K18-hACE2 mice were anesthetized with ketamine/xylazine (80/8 mg/kg) and intranasally  
314 inoculated with 2000 PFU SARS-CoV-2 suspended in 30 µl phosphate-buffered saline (PBS) and  
315 monitored for symptoms over a 10 day period. The day after infection, mice were treated with  
316 vehicle control (PBS), Minnelide low dose (0.0025mg/day) or high dose (0.005mg/day) via  
317 intraperitoneal injection. Disease presentations ranged from moderate (fur ruffling, lack of responses  
318 to stimuli, weight loss) to predetermined endpoint of 20% loss of pre-infection body weight of the  
319 animals. Mice were euthanized on pre-determined days post infection, or at end-point, with  
320 ketamine/xylazine (100/10 mg/kg) and cardiac puncture was performed to collect blood for cytokine  
321 analysis along with brain, lung, and heart excised using aseptic technique. Partial lung and heart were  
322 homogenized in 1 ml of sterile PBS for cytokine analysis. Brain, partial lung and heart were  
323 processed for histology and/or measurement of viral load using RT-qPCR. For animals that reached  
324 humane euthanasia endpoints at any time, or those surviving the duration of the experiments, the  
325 brain, heart, lung, and serum were obtained at necropsy and processed for histology, ELISA, and  
326 measurement of viral load using RT-qPCR, respectively.

### 327 **4.4 Reverse transcriptase quantitative real-time PCR (RT-qPCR) of viral genomic RNA**

328 The left lobe and partial brain from each mouse was weighed (0.05-100mg) and placed in a  
329 prefilled bead tube containing 1.00mm glass beads (Beadbug, Z763756) and 600µl of lysis buffer  
330 with 1% BME from the Purelink RNA mini kit (Invitrogen, USA). The tissue was homogenized for 1  
331 minute disruption at 5 m/s and 1 min cooling in ice, repeated twice. Tubes were spun at 2000g for 5  
332 minutes at 4°C. RNA was isolated using kit directions including incorporation of homogenizer tubes  
333 (Invitrogen, 12183026) to remove remaining animal tissue.

334 One step RT-qPCR was conducted to detect the viral RNA load in each sample using Reliance  
335 One-Step Multiplex Supermix (BioRad, USA) containing the Reliance Reverse Transcriptase  
336 enzyme. Primers CoV2-S\_19F (5' -GCTGAACATGTCAACAACACTC- 3') and CoV2-S\_143R (5' -  
337 GCAATGATGGATTGACTAGC- 3') were designed to target a 125bp region of the SARS-CoV-2  
338 spike protein. Probe CoV2-S\_93FP (5' – ACTAATTCTCCTCGGCGGGC- 3') was fluorescently  
339 labeled with FAM dye for RT-qPCR detection using the QuantStudio 12K Flex Real-Time PCR  
340 System, as previously described (32). Each qPCR was prepared as a 20µL reaction containing  
341 12.5µL molecular grade H<sub>2</sub>O, 5µL 4X Reliance Supermix (1x final concentration), 0.2µL forward  
342 primer, 0.2µL reverse primer, and 0.1µL probe, with 2µL template RNA. During the RT-qPCR,  
343 reverse transcription occurred at 50°C for 10 minutes followed by a hot start step at 95°C for 10  
344 minutes. This was followed by denaturation at 95°C for 10 seconds and annealing at 60°C for 30  
345 seconds which were repeated for a total of 40 cycles. Viral copy number was extrapolated using  
346 synthetically generated internal qPCR standards as previously described (32).

#### 347 **4.5 Cytokine Analysis**

348 Serum was collected in BD Vacutainer™ tubes (ThermoFisher, USA). Samples were processed  
349 by centrifuging 3500 RPM for 5-10 minutes, supernatant collected, and protease inhibitor added  
350 (Halt™ cocktail, ThermoFisher, USA). Heart and lung were excised and homogenized in 1mL of ice-

351 cold sterile PBS, an antiprotease buffer solution containing PBS, protease inhibitors (inhibiting  
352 cysteine, serine, and other metalloproteinases), and 0.05% Triton X-100 was added to the  
353 homogenate and then clarified by centrifugation 3500 RPM for 10 minutes. Supernatants were  
354 assayed for the presence of IL-6, which was quantified using an Invitrogen ELISA kit  
355 (ThermoFisher, USA); and DDimer and Fibrinogen were quantified using Biomatik ELISA kits  
356 (Biomatik Corporation, Ontario, Canada).

#### 357 **4.6 Histology**

358 Tissues were fixed in histology cassettes suspended in 10% formalin (Sigma Aldrich) for 48  
359 hours. Histology cassettes of fixed tissues were then fixed using the routine overnight non-fat cycle  
360 on the Excelsior AS (Thermo Scientific) and embedded in paraffin wax (Histoplast LP, Fisher  
361 Scientific). Tissues were sectioned in 5 $\mu$ m thin sections onto charged slides and heat fixed overnight  
362 at 45°C. Sections were then processed for H&E staining and submitted to pathologist for analysis.

#### 363 **4.7 Statistical Analysis**

364 Differences in data were tested for significance using either GraphPad Prism for Windows  
365 (GraphPad, USA). For details of the statistical test applied, refer to the figure legends.  $P < 0.05$  were  
366 considered significant.

#### 367 **5 Acknowledgements**

368 Funding provided by Minneamrita Therapeutics LLC to NAU.

#### 369 **6 Conflict of Interest**



370 University of Minnesota has a patent for Minnelide (WO/ 2010/129918), which has been  
371 licensed to Minneamrita Therapeutics LLC. AKS is the cofounder and the CSO of this company.  
372 MRV is the cofounder and the CEO of this company. SMV has a financial interest in this company.

## 373 7 References

- 374 1. Tay, M.Z., Poh, C.M., Renia, L., MacAry, P.A., and Ng, L.F.P. (2020). The trinity of  
375 COVID-19: immunity, inflammation and intervention. *Nat Rev Immunol* 20, 363-374.
- 376 2. WHO Coronavirus disease 2019 (COVID-19) situation reports.  
377 <https://www.who.int/emergencies/diseases/novel-coronavirus-2019/situation-reports>.
- 378 3. Huang, C., Wang, Y., Li, X., Ren, L., Zhao, J., Hu, Y., Zhang, L., Fan, G., Xu, J., Gu, X., et  
379 al. (2020). Clinical features of patients infected with 2019 novel coronavirus in Wuhan,  
380 China. *Lancet* 395, 497-506.
- 381 4. Chen, G., Wu, D., Guo, W., Cao, Y., Huang, D., Wang, H., Wang, T., Zhang, X., Chen, H.,  
382 Yu, H., et al. (2020). Clinical and immunological features of severe and moderate coronavirus  
383 disease 2019. *J Clin Invest* 130, 2620-2629.
- 384 5. Buitrago-Garcia, D., Egli-Gany, D., Counotte, M.J., Hossmann, S., Imeri, H., Ipekci, A.M.,  
385 Salanti, G., and Low, N. (2020). Occurrence and transmission potential of asymptomatic and  
386 presymptomatic SARS-CoV-2 infections: A living systematic review and meta-analysis.  
387 *PLoS Med* 17, e1003346.
- 388 6. Clinical Spectrum of SARS-CoV-2 Infection.  
389 <https://www.covid19treatmentguidelines.nih.gov/overview/clinical-spectrum/>.
- 390 7. Blanco-Melo, D., Nilsson-Payant, B.E., Liu, W.C., Uhl, S., Hoagland, D., Moller, R., Jordan,  
391 T.X., Oishi, K., Panis, M., Sachs, D., et al. (2020). Imbalanced Host Response to SARS-CoV-  
392 2 Drives Development of COVID-19. *Cell* 181, 1036-1045 e1039.
- 393 8. Liao, M., Liu, Y., Yuan, J., Wen, Y., Xu, G., Zhao, J., Cheng, L., Li, J., Wang, X., Wang, F.,  
394 et al. (2020). Single-cell landscape of bronchoalveolar immune cells in patients with COVID-  
395 19. *Nat Med* 26, 842-844.
- 396 9. Schulert, G.S., Zhang, M., Fall, N., Husami, A., Kissell, D., Hanosh, A., Zhang, K., Davis,  
397 K., Jentzen, J.M., Napolitano, L., et al. (2016). Whole-Exome Sequencing Reveals Mutations  
398 in Genes Linked to Hemophagocytic Lymphohistiocytosis and Macrophage Activation  
399 Syndrome in Fatal Cases of H1N1 Influenza. *J Infect Dis* 213, 1180-1188.
- 400 10. Crayne, C.B., Albeituni, S., Nichols, K.E., and Cron, R.Q. (2019). The Immunology of  
401 Macrophage Activation Syndrome. *Front Immunol* 10, 119.
- 402 11. Rothan, H.A., and Byrareddy, S.N. (2020). The epidemiology and pathogenesis of  
403 coronavirus disease (COVID-19) outbreak. *J Autoimmun* 109, 102433.
- 404 12. Li, F. (2016). Structure, Function, and Evolution of Coronavirus Spike Proteins. *Annu Rev*  
405 *Viro* 3, 237-261.

- 406 13. Xu, H., Zhong, L., Deng, J., Peng, J., Dan, H., Zeng, X., Li, T., and Chen, Q. (2020). High  
407 expression of ACE2 receptor of 2019-nCoV on the epithelial cells of oral mucosa. *Int J Oral*  
408 *Sci* 12, 8.
- 409 14. Maggi, E., Canonica, G.W., and Moretta, L. (2020). COVID-19: Unanswered questions on  
410 immune response and pathogenesis. *J Allergy Clin Immunol* 146, 18-22.
- 411 15. Montagutelli, X., Prot, M., Levillayer, L., Baquero Salazar, E., Jouvion, G., Conquet, L.,  
412 Donati, F., Albert, M., Gambaro, F., Behillil, S., et al. (2021). The B1.351 and P.1 variants  
413 extend SARS-CoV-2 host range to mice.
- 414 16. Arce, V.M., and Costoya, J.A. (2021). SARS-CoV-2 infection in K18-ACE2 transgenic mice  
415 replicates human pulmonary disease in COVID-19. *Cell Mol Immunol* 18, 513-514.
- 416 17. Tseng, C.T., Huang, C., Newman, P., Wang, N., Narayanan, K., Watts, D.M., Makino, S.,  
417 Packard, M.M., Zaki, S.R., Chan, T.S., et al. (2007). Severe acute respiratory syndrome  
418 coronavirus infection of mice transgenic for the human Angiotensin-converting enzyme 2  
419 virus receptor. *J Virol* 81, 1162-1173.
- 420 18. Yinda, C.K., Port, J.R., Bushmaker, T., Offei Owusu, I., Purushotham, J.N., Avanzato, V.A.,  
421 Fischer, R.J., Schulz, J.E., Holbrook, M.G., Hebner, M.J., et al. (2021). K18-hACE2 mice  
422 develop respiratory disease resembling severe COVID-19. *PLoS Pathog* 17, e1009195.
- 423 19. Chugh, R., Sangwan, V., Patil, S.P., Dudeja, V., Dawra, R.K., Banerjee, S., Schumacher, R.J.,  
424 Blazar, B.R., Georg, G.I., Vickers, S.M., et al. (2012). A preclinical evaluation of Minnelide  
425 as a therapeutic agent against pancreatic cancer. *Sci Transl Med* 4, 156ra139.
- 426 20. Nomura, A., Majumder, K., Giri, B., Dauer, P., Dudeja, V., Roy, S., Banerjee, S., and Saluja,  
427 A.K. (2016). Inhibition of NF-kappa B pathway leads to deregulation of epithelial-  
428 mesenchymal transition and neural invasion in pancreatic cancer. *Lab Invest* 96, 1268-1278.
- 429 21. Xi, Y., Zhang, Y., Pan, J., Chen, S., Lu, S., Shen, F., and Huang, Z. (2020). Triptolide  
430 dysregulates glucose uptake via inhibition of IKKbeta-NF-kappaB pathway by p53 activation  
431 in cardiomyocytes. *Toxicol Lett* 318, 1-11.
- 432 22. Song, C., Wang, Y., Cui, L., Yan, F., and Shen, S. (2019). Triptolide attenuates  
433 lipopolysaccharide-induced inflammatory responses in human endothelial cells: involvement  
434 of NF-kappaB pathway. *BMC Complement Altern Med* 19, 198.
- 435 23. Huang, Y., Chen, Z., Wang, Y., Ba, X., Huang, Y., Shen, P., Wang, H., and Tu, S. (2019).  
436 Triptolide exerts an anti-tumor effect on nonsmall cell lung cancer cells by inhibiting  
437 activation of the IL6/STAT3 axis. *Int J Mol Med* 44, 291-300.
- 438 24. Kong, X., Zhang, Y., Liu, C., Guo, W., Li, X., Su, X., Wan, H., Sun, Y., and Lin, N. (2013).  
439 Anti-angiogenic effect of triptolide in rheumatoid arthritis by targeting angiogenic cascade.  
440 *PLoS One* 8, e77513.
- 441 25. Wang, X., Zhang, L., Duan, W., Liu, B., Gong, P., Ding, Y., and Wu, X. (2014). Anti-  
442 inflammatory effects of triptolide by inhibiting the NF-kappaB signalling pathway in LPS-  
443 induced acute lung injury in a murine model. *Mol Med Rep* 10, 447-452.
- 444 26. Nomura, A., Gupta, V.K., Dauer, P., Sharma, N.S., Dudeja, V., Merchant, N., Saluja, A.K.,  
445 and Banerjee, S. (2018). NFkappaB-Mediated Invasiveness in CD133(+) Pancreatic TICs Is  
446 Regulated by Autocrine and Paracrine Activation of IL1 Signaling. *Mol Cancer Res* 16, 162-  
447 172.

- 448 27. Ziehr, D.R., Alladina, J., Petri, C.R., Maley, J.H., Moskowitz, A., Medoff, B.D., Hibbert,  
449 K.A., Thompson, B.T., and Hardin, C.C. (2020). Respiratory Pathophysiology of  
450 Mechanically Ventilated Patients with COVID-19: A Cohort Study. *Am J Respir Crit Care*  
451 *Med* 201, 1560-1564.
- 452 28. Bockenstedt, P. (2003). D-dimer in venous thromboembolism. *N Engl J Med* 349, 1203-1204.
- 453 29. Berger, J.S., Kunichoff, D., Adhikari, S., Ahuja, T., Amoroso, N., Aphinyanaphongs, Y., Cao,  
454 M., Goldenberg, R., Hindenburg, A., Horowitz, J., et al. (2020). Prevalence and Outcomes of  
455 D-Dimer Elevation in Hospitalized Patients With COVID-19. *Arterioscler Thromb Vasc Biol*  
456 40, 2539-2547.
- 457 30. Porfidia, A., and Pola, R. (2020). Venous thromboembolism in COVID-19 patients. *J Thromb*  
458 *Haemost* 18, 1516-1517.
- 459 31. Thachil, J., and Agarwal, S. (2020). Understanding the COVID-19 coagulopathy spectrum.  
460 *Anaesthesia* 75, 1432-1436.
- 461 32. Stone, N.E., S. A. Jaramillo, A. N. Jones, A. J. Vazquez, M. Martz, L. M. Versluis, M.  
462 O. Ranieri, H. E. Nunnally, K. E. Zarn, R. Nottingham, K. R. Ng, J. W. Sahl, D.  
463 M. Wagner, S. Knudsen, E. W. Settles, P. Keim, C. T. French (2021). Stenoparib, an Inhibitor  
464 of Cellular Poly(ADP-Ribose) Polymerase, Blocks Replication of the SARS-CoV-2 and  
465 HCoV-NL63 Human Coronaviruses *in vitro* *mBio* 12 e03495-20.  
466

467

468

469

470

471

472

473

474

475

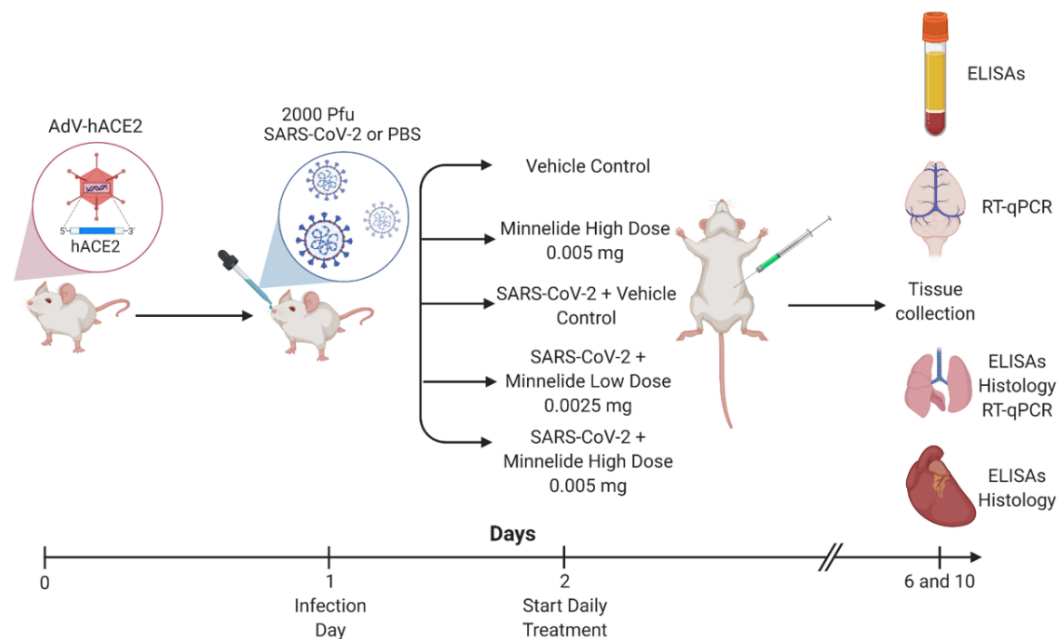

476 **Figure 1. Experimental Schematic of Infection and Treatment of K18-hACE2 Mice.** K18-

477 hACE2 were infected with 2000 PFU on day 1 or given PBS intranasally. Daily treatments of

478 Minnelide started on day 2 via intraperitoneal (IP) injections with either vehicle control (PBS),

479 Minnelide low dose (0.0025mg/day or high dose (0.005mg/day). On days 6 and 10, tissues were

480 extracted for ELISAs, RT-qPCR, or Histology.

481  
482  
483  
484  
485  
486  
487  
488  
489  
490  
491  
492  
493  
494  
495  
496  
497  
498

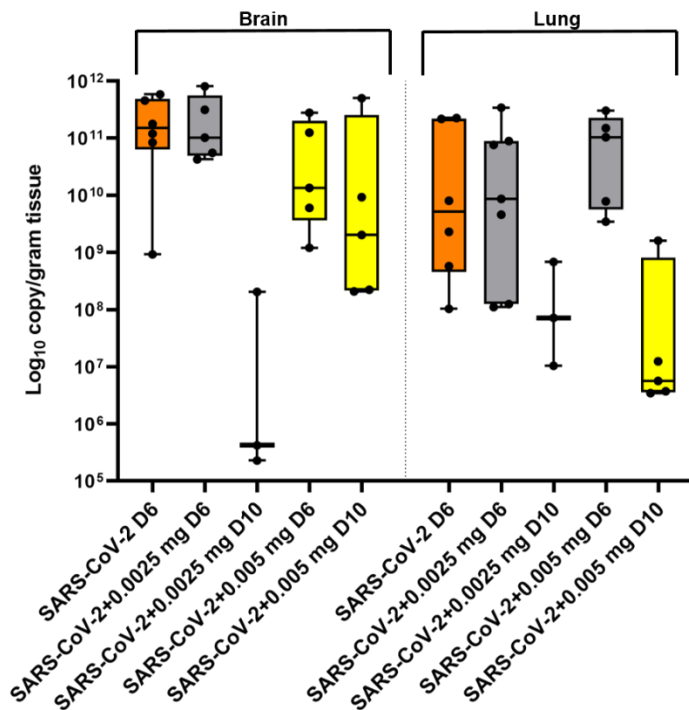

**Figure 2. Viral burden of SARS-CoV-2 Infected Mice Treated with Minnelide.** K18-hACE2

mice received an intranasal infection with 2000 PFU of SARS-CoV-2 and were treated twice daily via oral gavage with either low dose (0.0025mg) or high dose (0.005mg) of Minnelide. At days 6 and 10 post infection, brain and lung were excised, homogenized, and RNA was extracted. RNA data is cumulative of one experiment using 3-6 mice per group per experiment.

499

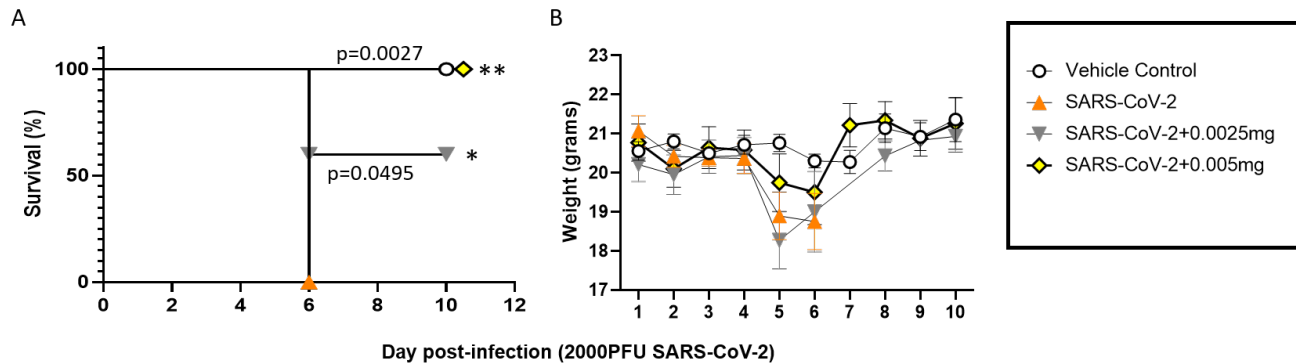

500

501

502 **Figure 3. Treatment of Minnelide against SARS-CoV-2 increased protection in mice.** K18-  
503 hACE2 mice infected with 2000 PFU SARS-CoV-2 and treated with Minnelide were observed for 10  
504 days post-infection for survival analysis (A) and weighed daily (B). For (A), n=5 and (B) n= 5-10  
505 mice per group. Minnelide only group is not presented since this group was female mice and  
506 demonstrated much less weight overall, which did not change overtime, compared to male mice. Data  
507 are presented as mean values  $\pm$  SEM (B). Significance was tested by Log-rank (Mantel-Cox) test (A)  
508 or one-way ANOVA (B). Survival significance is shown against SARS-CoV-2 non-treated group  
509 (A). Data is from one experiment.

510

511

512

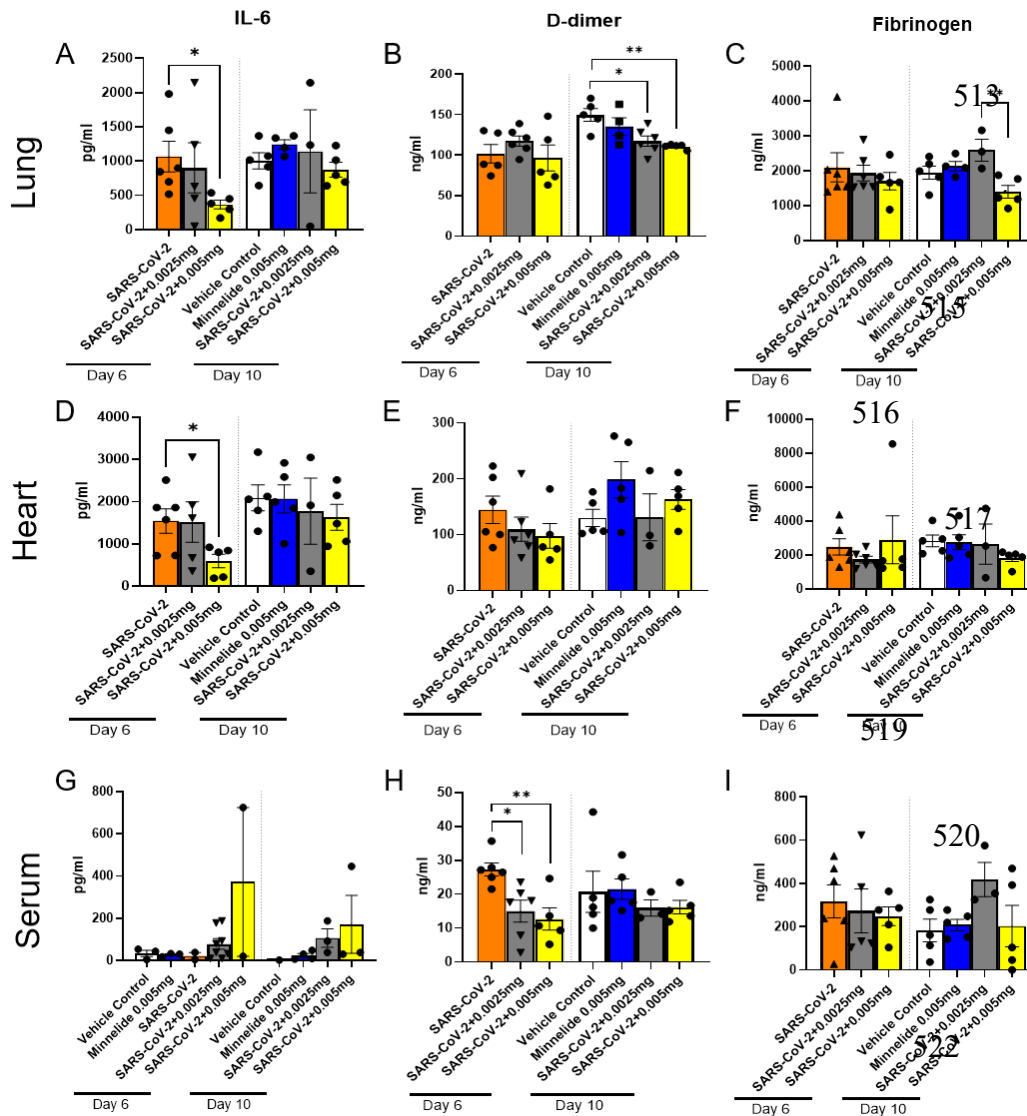

518

523 **Figure 4. Pulmonary Cytokine Milieu in SARS-CoV-2 Infected Mice Treated with Minnelide.**

524 K18-hACE2 mice received an intranasal infection with 2000 PFU of SARS-CoV-2 and were treated

525 daily with either low dose (0.0025mg) or high dose (0.005mg) of Minnelide. At days 6 and 10 post

526 infection, lung (A-C) and heart (B-F) were excised, homogenized, and supernatant collected along

527 with serum (G-I) for cytokine analysis. Cytokine data is cumulative of one experiment using 5-6

528 mice per group per time point. Significance was tested by one-way ANOVA. \*  $p < 0.05$  and \*\*  $p <$

529 0.001.

530

531

532

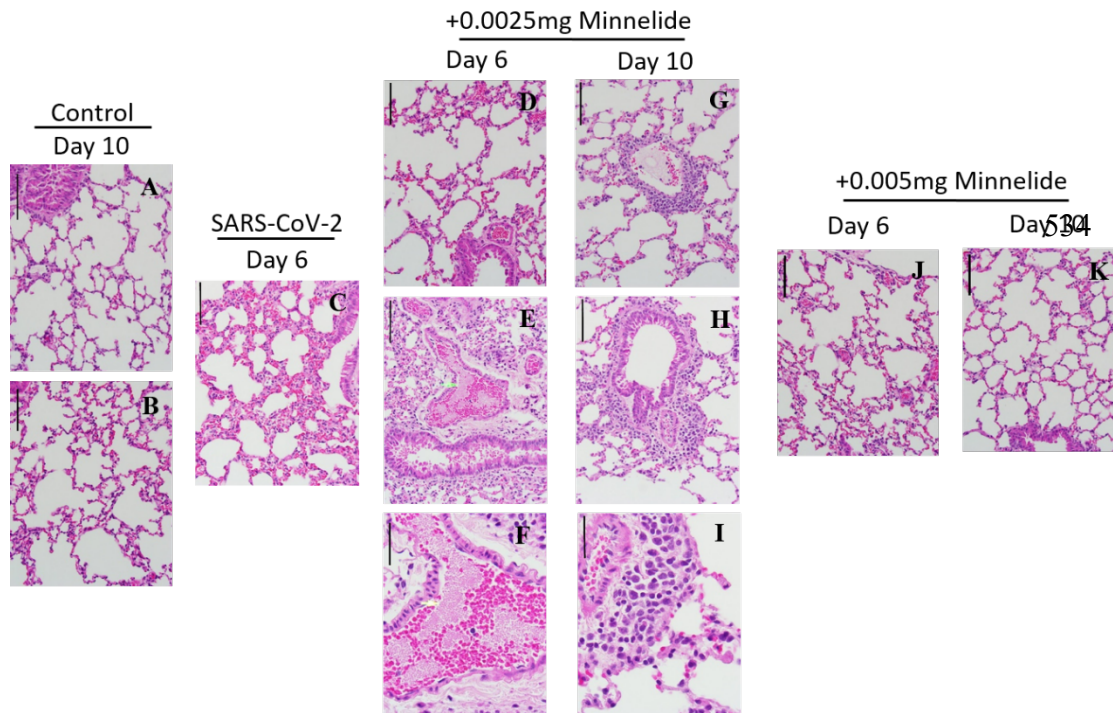

538

539 **Figure 5.** Histopathological Analysis of Mice after SARS-CoV-2 infection and Treatment with  
540 Minnelide. Histopathology of representative hematoxylin-and-eosin-stained, lung sections from  
541 Vehicle control mice at day 10 post-infection (A) High dose Minnelide (0.005mg) treated mice at day  
542 10 post-infection (B) SARS-CoV-2 infected non-treated mice at day 6 post-infection (C) SARS-  
543 CoV-2 infected mice treated with low dose Minnelide (0.0025mg) at day 6 post-infection (D-F) and  
544 at day 10 post-infection (G-I) SARS-CoV-2 infected mice treated with high dose Minnelide  
545 (0.005mg) at day 6 post-infection (J) and day 10 post-infection (K). (A-E, G-H, and J-K) Scale bar  
546 50µm and (F and I) scale bar 20µm.

547
